# Supplementary material for: A Sensitive Whole Blood Assay Detects Antigen-Stimulated Cytokine Release From CD4+ T Cells and Facilitates Immunomonitoring in a Phase 2 Clinical Trial of Nexvax2 in Coeliac Disease
Source: Front Immunol. 2021 May 19;12:661622. doi: 10.3389/fimmu.2021.661622 (PMC8171185; doi:10.3389/fimmu.2021.661622)
Supplement: Supplementary file 2 [file Table_1.xlsx]

## Sheet: Sheet1
Table S1. Effect of delaying incubation of whole blood with antigen on cell counts per well† and cytokine concentrations‡ in 24-hour whole blood assays for two CD patients
† 225 mL fresh unseparated heparinised blood was added to individual wells; ‡ blood was added to six separate wells for each condition, after 24-hour incubation plasma was separated, individual "raw" vaues and the mean are shown without normalisation for T-cell frequencies.
Cytokine		IL-2										IFN-g										IL-10
Particpant		S0568					S0211					S0568					S0211					S0568					S0211
Delay		24 min	3 h	8 h	27 h		3 min	3 h	8 h	27 h		24 min	3 h	8 h	27 h		3 min	3 h	8 h	27 h		24 min	3 h	8 h	27 h		3 min	3 h	8 h	27 h
Cell subset frequency (living cells) per well (225 ml)
CD4+CD3+ T cells		208466	205002	223332	114113		146304	129899	135775	137626		208466	205002	223332	114113		146304	129899	135775	137626		208466	205002	223332	114113		146304	129899	135775	137626
CD3+CD8+ T cells		76242.1	76266	86894	42610.4		77016.8	69415.8	72536.3	74549.8		76242.1	76266	86894	42610.4		77016.8	69415.8	72536.3	74549.8		76242.1	76266	86894	42610.4		77016.8	69415.8	72536.3	74549.8
CD19+CD20+ B cells		65242.1	62694.2	74053.9	33874.8		39710.9	34243.4	35161.8	37898.2		65242.1	62694.2	74053.9	33874.8		39710.9	34243.4	35161.8	37898.2		65242.1	62694.2	74053.9	33874.8		39710.9	34243.4	35161.8	37898.2
CD14+ Monocytes		41190.4	52546.9	35053.3	22366.1		47738.3	36942.8	35748.1	40149.7		41190.4	52546.9	35053.3	22366.1		47738.3	36942.8	35748.1	40149.7		41190.4	52546.9	35053.3	22366.1		47738.3	36942.8	35748.1	40149.7
Antigen-stimulated cytokine release (pg/ml)
Control	Replicate 1	0.0528758	0.0607142	1.2979	0.00191384		0.0604151	0.0551331	0.0475165	0.0530676		1.95536	1.43381	1.34762	1.71591		3.71279	3.78484	2.30495	2.05608		0.0999702	0.165968	0.119728	2.36638		1.11325	0.166213	0.288953	0.891067
	Replicate 2	0.335996	0.0164138	0.0660506	0.0413615		0.120745	0.0551331	0.00718467	0.577036		1.61918	1.9742	1.74553	0.645766		5.18746	4.61688	1.98308	3.40728		0.139888	0.287978	0.240339	2.18944		0.40785	0.633047	0.125556	1.24698
	Replicate 3	0.474002	0.188851	0.0344611	0.0129109		0.0291701	0.0116912	1.24851	0.0530676		4.34973	3.53665	5.62816	2.9052		4.63955	3.87569	3.00032	2.93682		0.120516	0.159625	0.209478	0.864984		0.186708	1.13094	1.60873	2.26747
	Replicate 4	0.778963	0.0806891	0.0481177	0.290232		4.68808	0.0551331	0.0475165	0.000688814		1.84326	1.9874	2.06471	0.998359		9.47366	4.17447	2.35453	2.923		0.116151	0.139258	0.23442	2.93602		5.34262	0.935503	0.300877	0.819715
	Replicate 5	0.0528758	0.0863097	0.0510446	0.0491412		0.0275812	0.92739	0.0639324	0.0416274		2.21332	2.44992	1.5521	1.01191		4.04315	3.90165	2.80138	3.60143		0.158064	0.165263	0.0433482	2.458		0.362642	0.534978	0.367791	1.45289
	Replicate 6	0.0528758	1.78074	0.0510446	0.0491412		0.15249	0.0551331	0.00955867	0.0192252		1.59678	2.01381	1.18885	2.45945		6.96435	3.46071	2.21822	3.50432		0.123636	0.130164	0.115218	1.43394		0.355419	0.844125	0.224039	2.19658
	Mean	0.291265	0.368954	0.258103	0.0741168		0.846414	0.193269	0.23737	0.124119		2.26294	2.23263	2.2545	1.62277		5.67016	3.96904	2.44375	3.07149		0.126371	0.174709	0.160422	2.04146		1.29475	0.707467	0.485992	1.47912
NX	Replicate 1	594.111	532.728	290.906	136.729		129.584	44.6859	41.1061	24.9003		2901	2183.56	1124.13	211.198		661.23	268.885	266.131	75.6555		12.3171	5.93952	1.7357	2.47928		3.89927	7.65585	1.51367	0.811802
	Replicate 2	579.398	575.435	359.312	141.46		106.815	37.7829	26.2314	39.4251		3196.32	2338.35	1568.64	267.168		492.151	177.889	116.26	111.456		10.1942	7.30061	4.20666	2.05095		5.33307	0.793829	0.722835	1.52424
	Replicate 3	569.216	459.472	317.524	152.49		150.732	49.3901	23.2378	37.8872		2915.05	2411.38	1143.44	213.645		840.731	296.753	203.152	108.428		14.0449	5.30213	2.43263	2.09318		8.80485	1.58828	1.16353	0.577556
	Replicate 4	651.377	545.339	247.94	122.263		114.41	100.029	31.7424	23.4347		2933.55	2551.52	1087.18	237.729		485.959	454.253	122.648	116.27		13.5352	8.4118	2.67632	2.00221		4.34758	3.63691	0.748886	2.75112
	Replicate 5	532.043	657.325	383.67	129.419		66.7756	48.9461	42.0512	35.6686		3390.17	2652.31	1579.52	265.362		307.501	347.039	89.7135	162.55		8.16833	7.57469	2.60137	2.07061		1.3438	1.51099	1.82035	3.74293
	Replicate 6	588.311	487.74	364.426	130.86		133.431	58.2611	31.6237	42.5475		3301.38	2130.28	1622.76	288.266		784.306	361.604	94.4053	119.617		10.3998	6.8159	4.92314	1.00003		6.16923	1.97605	0.581592	18.1
	Mean	585.743	543.006	327.296	135.537		116.958	56.5158	32.6654	33.9772		3106.25	2377.9	1354.28	247.228		595.313	317.737	148.718	115.663		11.4433	6.89077	3.09597	1.94938		4.98297	2.86032	1.09181	4.5846
xNX	Replicate 1	158.317	128.491	71.5833	21.9435		61.7877	34.4269	20.7329	10.0499		730.231	511.833	421.653	44.7703		278.745	104.382	84.9339	18.2395		5.47231	2.1497	2.69613	4.69608		3.29697	0.499609	1.64964	3.86511
	Replicate 2	204.864	132.909	116.041	12.6155		105.684	22.6762	6.5706	8.69831		1099.6	518.705	553.381	46.5112		410.792	75.1541	37.4919	17.6353		7.25561	1.4484	2.12996	2.37663		3.80443	0.948171	2.85353	4.50385
	Replicate 3	149.651	110.47	110.282	24.4576		81.0983	21.2106	15.3171	8.9533		808.499	382.177	532.187	46.2166		211.966	121.624	58.0213	46.2056		3.56911	2.04842	1.55034	7.53944		2.14297	3.55204	3.68663	3.07528
	Replicate 4	205.22	221.026	120.279	24.3334		55.8788	57.3644	14.3079	9.34085		1049.24	839.337	381.88	53.6206		174.925	166.711	62.9315	15.7681		4.3909	1.89223	2.25862	4.36444		2.22543	6.29503	1.14442	5.22586
	Replicate 5	206.288	172.328	109.058	19.905		54.9682	23.4907	7.95579	23.947		1038.2	657.58	634.958	37.269		241.468	211.471	27.9519	45.8529		4.47215	3.69074	1.4017	4.81695		1.38928	2.2031	1.14663	2.90926
	Replicate 6	192.404	156.146	129.841	23.9335		41.0587	22.3027	18.8855	0.0981726		894.454	636.735	741.055	37.4164		263.861	93.6365	90.2492	3.13034		3.33424	2.20275	1.2964	5.0818		0.852433	0.332704	0.517827	0.851398
	Mean	186.124	153.561	109.514	21.1981		66.746	30.2452	13.9616	10.1813		936.704	591.061	544.186	44.3007		263.626	128.83	60.2633	24.472		4.74905	2.23871	1.88886	4.81256		2.28525	2.30511	1.83311	3.40513
NXxNX	Replicate 1	527.794	594.211	281.798	89.8694		168.41	62.946	33.5642	9.07824		2408.46	2795.87	1205.47	402.743		763.674	186.372	91.0462	15.7251		16.3447	5.61721	3.35862	0.828561		4.95037	2.13765	1.61542	0.471058
	Replicate 2	477.989	522.521	259.014	61.4664		57.6975	77.1285	39.251	9.32119		2526.54	2253.45	939.243	241.982		305.014	208.239	117.833	21.0938		8.76733	7.48355	2.02819	1.1536		4.11	0.777592	0.447926	0.489651
	Replicate 3	551.753	541.269	321.603	103.797		77.5215	40.5714	48.9908	8.37602		3054.49	2236.47	981.367	174.229		302.973	324.007	170.974	62.3691		14.2916	6.67452	2.66218	0.746167		1.72051	1.30393	0.616802	0.417771
	Replicate 4	561.467	599.073	320.665	156.266		52.3716	38.1495	14.0611	5.84165		2917.67	1963.2	1349.83	297.151		232.004	143.412	142.066	46.2938		11.5385	8.02694	3.89492	1.27169		2.15889	1.48884	1.2585	0.632286
	Replicate 5	560.84	539.398	283.105	109.461		98.0077	36.9509	15.6829	22.4284		2409.96	2078.9	1027.92	216.546		356.372	83.6433	78.7889	30.5931		14.7581	8.37798	4.06754	1.01767		2.01659	1.15955	0.424469	0.478027
	Replicate 6	588.143	649.111	205.233	109.42		85.5026	34.5007	38.9334	7.67103		2694.8	2517.06	716.376	294.515		375.102	123.785	204.884	44.6338		14.4734	8.45388	3.53044	1.09333		2.27232	0.754007	0.804712	1.03605
	Mean	544.664	574.264	278.57	105.047		89.9185	48.3745	31.7472	10.4528		2668.65	2307.49	1036.7	271.194		389.19	178.243	134.265	36.7848		13.3623	7.43901	3.25698	1.0185		2.87145	1.27026	0.861306	0.587473
CEFT	Replicate 1	120.225	106.308	82.2287	60.1967		65.9696	160.435	61.369	1.5677		383.49	185.82	188.375	76.8507		206.056	478.252	158.413	10.9241		1.13381	1.37785	1.81952	3.55385		0.439557	1.61511	0.557919	0.648743
	Replicate 2	166.7	140.909	152.03	48.4039		25.1527	82.3088	41.3768	1.31362		408.752	345.741	265.366	43.3239		72.5524	216.257	155.424	12.1491		0.916611	1.86354	0.760005	15.6348		2.15046	0.742966	0.364258	0.54871
	Replicate 3	102.545	160.538	129.999	72.5753		128.795	59.0351	50.856	5.1725		174.21	330.93	318.995	88.8487		370.908	106.121	146.499	6.57924		1.61652	2.57077	0.259441	1.95135		1.04953	0.524137	0.615364	1.68281
	Replicate 4	123.111	142.833	171.894	70.9327		20.8069	44.4856	44.8788	1.32841		329.626	217.556	239.795	70.9376		72.9966	289.559	112.287	5.12034		1.40004	1.20135	0.674367	1.07634		1.36329	0.489528	0.347317	1.12247
	Replicate 5	139.797	141.956	117.722	86.9601		21.3535	79.7599	56.2029			364.282	229.459	180.151	81.1714		79.3565	241.436	187.455			1.01723	1.85734	0.490664	1.5416		0.19473	1.59825	0.536429	0.464867
	Replicate 6	129.702	123.21	121.956	81.2567		23.3965	76.691	53.7501	4.16121		232.08	159.703	228.566	79.1649		60.5531	249.672	164.949	12.9911		1.60198	3.05869	0.608659	1.15999		1.17613	0.722378	0.435126	1.06322
	Mean	130.346	135.959	129.305	70.0542		47.5791	83.7859	51.4056	2.70869		315.406	244.868	236.875	73.3829		143.737	263.549	154.171	9.5528		1.28103	1.98825	0.768777	4.15298		1.06228	0.948728	0.476069	0.921804
