# Supplementary material for: A Sensitive Whole Blood Assay Detects Antigen-Stimulated Cytokine Release From CD4+ T Cells and Facilitates Immunomonitoring in a Phase 2 Clinical Trial of Nexvax2 in Coeliac Disease
Source: Front Immunol. 2021 May 19;12:661622. doi: 10.3389/fimmu.2021.661622 (PMC8171185; doi:10.3389/fimmu.2021.661622)
Supplement: Supplementary file 3 [file Table_2.xlsx]

## Sheet: Table S2
Table S2. Cell counts per well† and cytokine concentrations‡ in 24-hour whole blood assays before and after 12-weeks dosing in the RESET CED Study
† 225 mL fresh unseparated heparinised blood was added to individual wells; ‡ blood was added to six separate wells for each condition, after 24-hour incubation plasma from two adjacent wells were pooled and consequently triplicate cytokine measurements were made for each condition, individual "raw" vaues and the mean are shown without normalisation for T-cell frequencies. †† Delay between blood …
Particpant		Treatment				Visit 5 - Pre-treatment																									Visit 28 - 12-weeks treatment including 5-weeks up-dosing and 7 weeks maintenance-dosing
				Delay††		Live cells per well in 0.225 ml blood					IL-2 pg/ml						IFN-γ pg/ml						IL-10 pg/ml						Delay††		Live cells per well in 0.225 ml blood					IL-2 pg/ml						IFN-γ pg/ml						IL-10 pg/ml
				Min		CD4+CD3+ T cells	CD3+CD8+ T cells	CD19+CD20+ B cells	CD14+ Monocytes		Control	NX	xNX	NXxNX	CEFT		Control	NX	xNX	NXxNX	CEFT		Control	NX	xNX	NXxNX	CEFT		Min		CD4+CD3+ T cells	CD3+CD8+ T cells	CD19+CD20+ B cells	CD14+ Monocytes		Control	NX	xNX	NXxNX	CEFT		Control	NX	xNX	NXxNX	CEFT		Control	NX
s002		Nexvax2		10		206707	99340.3	69777.1	57429.7		0.310573	1.88342	2.20201	1.31099	51.4071		41.5965	38.6964	38.8353	26.5033	386.763		1.41771	0.585198	0.41835	0.141376	2.25993		10		180519	89521.2	62279.8	62755.9		0.0574381	0.182209	0.169385	0.142435	36.128		2.32344	1.57971	2.56035	1.65895	157.76		0.211666	0.354936
											0.122697	0.737541	1.96913	0.712002	64.4072		41.1647	38.0946	56.6428	34.6826	425.785		2.35579	0.621706	0.500026	0.105814	1.21752									0.169385	0.145264	1.48806	0.494213	34.5245		1.83317	1.99143	2.43402	1.67479	145.861		0.303695	0.31759
											0.439535	1.62875	4.25988	1.31407	67.1069		39.3753	42.9689	43.0305	30.1855	341.724		2.3767	0.706035	0.565207	0.124895	1.68849									0.118482	2.47671	1.34326	0.212258	50.0288		2.22863	2.44982	1.99143	2.11796	292.569		0.387944	0.298485
											0.290935	1.41657	2.81034	1.11235	60.9737		40.7122	39.92	46.1695	30.4572	384.758		2.05007	0.637647	0.494528	0.124028	1.72198									0.115102	0.934728	1.00024	0.282969	40.2271		2.12841	2.00698	2.3286	1.81723	198.73		0.301102	0.32367
s004		Nexvax2		180		289694	95694.3	82009.4	30358.4		83.4591	0.0543188	4.45975	0.555953	5.48176		569.451	0.578423	4.22388	3.26022	16.8999		0.438614	0.0270099	0.0399692	0.0741314	0.042177		130		160186	61658.4	34940.2	38100.5		0.218154	1.42929	0.0520829	0.281135	109.615		3.75745	4.14869	2.61102	3.2753	838.227		0.146039	0.127747
											97.247	0.0520829	1.60656	3.0963	1.63126		689.62	0.578423	3.12447	3.6671	6.09936		0.310703	0.0270099	0.0275317	0.0966823	0.129269									0.842414	1.74258	1.28332	1.71009	134.939		15.7741	6.77284	2.44467	2.61102	1108.26		0.104235	0.162099
											83.0951	0.0520829	0.703291	4.00267	5.68974		560.271	0.578423	2.76214	5.87469	13.2972		0.299781	0.0270099	0.0876412	0.16593	0.090652									0.394877	0.301732	0.253251	0.0571272	117.15		2.56566	2.85277	1.82346	3.29038	1002.89		0.149094	0.21672
											87.9337	0.0528282	2.25653	2.55164	4.26759		606.448	0.578423	3.37016	4.26734	12.0988		0.349699	0.0270099	0.0517141	0.112248	0.087366									0.485148	1.15787	0.529553	0.682785	120.568		7.36575	4.59143	2.29305	3.0589	983.127		0.133123	0.168855
s014		Nexvax2		40		174893	81478.5	70371	50964.7		0.0594564	0.0594564	0.0594564	0.0594564	14.855		1.33006	0.589152	0.737252	0.766878	96.7486		0.333777	0.314185	0.920617	0.197139	1.53829		60		185509	79775.4	64033.4	51612.1		0.0594564	0.0594564	0.0594564	0.0594564	21.548		1.28558	0.929851	1.40419	1.68596	142.004		0.361568	0.455008
											0.0594564	0.0594564	1.14597	0.0594564	24.5286		0.554946	1.37454	21.1853	0.554946	120.746		0.36484	0.540553	0.684201	0.132609	1.50136									0.0594564	0.0594564	1.75794	0.0594564	24.5516		1.93814	1.34488	1.18181	1.34488	124.167		0.38612	0.459936
											0.0594564	0.0594564	1.0991	0.0594564	22.4442		0.554946	0.554946	0.554946	0.554946	91.8516		0.401684	0.450902	1.02217	0.17935	1.15897									0.0594564	0.0594564	0.0594564	0.0594564	18.396		1.37454	1.30041	1.04841	1.16698	122.509		0.366476	0.461579
											0.0594564	0.0594564	0.768176	0.0594564	20.6093		0.813317	0.839546	7.49251	0.62559	103.116		0.366767	0.435214	0.875664	0.169699	1.39954									0.0594564	0.0594564	0.625618	0.0594564	21.4985		1.53275	1.19171	1.21147	1.39928	129.56		0.371388	0.458841
s015		Nexvax2		10		132268	40423	47672.8	36747.5		0.13494	6.25098	7.59462	1.15602	15.5014		2.32391	20.6045	20.8875	9.01058	42.0478		0.579295	0.519966	0.395949	0.249854	0.597445		20		124783	32215.1	35429.4	33986.6		0.0978706	1.33547	0.0962637	0.159212	1.82375		4.2838	6.70596	2.9473	2.54652	8.80238		0.26937	0.25473
											1.33211	5.02231	1.58771	1.317	6.64771		3.02153	12.3576	3.74911	2.68011	20.1131		0.428742	0.524082	0.44023	0.197139	0.680892									1.10579	0.125251	0.0594564	1.70903	1.37242		3.45211	3.30362	3.46696	4.20953	11.5096		0.315817	0.278323
											0.0706189	2.78279	4.50412	4.80085	6.59249		2.84339	14.6494	23.3747	12.2684	23.5981		0.589193	0.554561	0.240105	0.166432	0.51832									0.791962	0.118799	0.107521	1.22306	2.21263		3.52635	4.12041	3.46696	3.80851	14.1434		0.270183	0.365658
											0.512557	4.68536	4.56215	2.42462	9.58054		2.72961	15.8705	16.0038	7.98635	28.5863		0.53241	0.53287	0.358761	0.204475	0.598886									0.665208	0.526507	0.0877472	1.03043	1.80293		3.75409	4.71	3.29374	3.52152	11.4851		0.285123	0.29957
s018		Nexvax2		270		143301	57194.7	39276.3	36293.8		0.0602764	0.935907	0.828723	1.1743	1.89652		2.18317	12.1063	15.4546	3.85427	6.4855		0.167036	0.195097	0.107333	0.156376	0.201794		220		185508	76121.2	55580.2	37809.9		0.0602764	0.91077	0.179633	0.09801	1.36787		2.43761	2.04149	2.11236	1.81426	6.92558		0.184395	0.263648
											0.0602764	1.33249	0.293105	1.14404	2.14554		3.32318	14.889	3.6728	8.17327	15.6431		0.177713	0.166369	0.135112	0.0921941	0.178381									0.0602764	0.593298	0.222301	0.981177	6.23023		1.57201	2.64912	2.91641	11.8895	20.684		0.247473	0.252188
											0.0602764	0.498467	3.88799	0.204234	0.284859		2.76174	2.70545	5.9619	4.74459	3.51908		0.193759	0.185063	0.177713	0.0621149	0.194428									0.179633	0.0602764	0.0882666	0.0602764	2.29482		2.87425	2.36701	3.86821	1.89955	13.2833		0.208497	0.207826
											0.0602764	0.922289	1.66994	0.84086	1.44231		2.75603	9.90026	8.36312	5.59071	8.54922		0.179503	0.182177	0.140053	0.103562	0.191535									0.100062	0.521448	0.1634	0.379821	3.29764		2.29463	2.35254	2.96566	5.20112	13.631		0.213455	0.241221
s024		Nexvax2		270		184259	86631.1	44212.5	31391		2.99381	22.4995	5.75414	24.4915	17.3778		27.8677	58.1915	26.5439	55.1327	115.408		0.477657	0.376147	0.459107	0.172779	0.483844		240		163092	90004.4	44511.6	20457		6.51354	7.15792	3.48357	1.51732	31.9101		49.9788	40.4964	38.7881	2.26553	217.671		0.0695765	0.168056
											2.61243	27.8637	18.9932	14.1262	21.9201		29.0404	51.0454	30.8932	28.7268	102.957		0.474908	0.516863	0.542341	0.324888	0.455673									6.23701	4.11512	0.929784	0.0638494	29.7303		49.263	21.5928	21.5243	0.76912	127.013		0.107578	0.264932
											4.52717	17.3937	14.6877	58.3165	17.5189		62.8216	71.9981	30.3621	71.1122	87.8879		0.512733	0.489344	0.503788	0.393262	0.662435									3.70158	1.88545	5.21383	0.0853257	39.3275		22.1134	4.18053	34.3214	1.87953	239.986		0.380938	0.256774
											3.3778	22.5857	13.145	32.3114	18.9389		39.9099	60.4116	29.2664	51.6573	102.084		0.488433	0.460785	0.501745	0.296976	0.533984									5.48404	4.38616	3.20906	0.555498	33.656		40.4517	22.0899	31.5446	1.63806	194.89		0.186031	0.22992
s026		Nexvax2		10		413232	112530	90438.7	43859.4		0.267929	16.8147	4.25543	12.3974	219.037		2.05491	32.0315	10.2797	10.0298	1685.1		0.49883	0.345517	0.30658	0.138234	0.63159		60		391503	120808	95824.9	42754		0.214784	1.18001	1.28052	2.58149	155.083		1.6516	1.91109	1.4202	2.2559	1314.63		1.01931	5.31493
											0.0599831	12.3417	11.165	12.2482	202.712		2.44219	14.1934	23.307	13.9866	1226.52		0.479988	0.245486	0.233698	0.078338	0.490455									0.0599831	1.41189	1.06981	2.52132	184.828		1.95426	1.82468	2.48513	1.20252	1231.54		1.08537	1.06639
											0.0599831	20.8682	11.6844	7.23773	199.499		1.59382	34.7112	9.30713	10.9178	1273.96		0.295463	0.238551	0.266994	0.0886425	0.542819									0.0599831	2.14742	2.62215	2.94103	188.58		2.61387	8.12311	3.41207	2.44219	1552.32		1.66871	10.1491
											0.129298	16.6748	9.03497	10.6278	207.083		2.0303	26.9787	14.298	11.6448	1395.19		0.424761	0.276518	0.269091	0.101738	0.554955									0.111583	1.57977	1.65749	2.68128	176.164		2.07324	3.95296	2.43914	1.96687	1366.16		1.2578	5.51015
s037		Nexvax2		15		218451	69901	54493.2	40304		0.175852	4.7052	1.96633	5.19201	24.7042		8.87897	10.5582	12.704	11.911	99.0658		1.89002	0.86428	0.994498	0.239096	0.817887		35		220820	68800.1	49754.3	33271		0.214999	3.33579	0.636255	0.798155	28.2784		2.98605	3.74792	3.85676	5.44271	94.1832		1.56115	0.546042
											0.150913	2.35611	3.5803	7.76817	29.6057		8.84788	7.54178	12.7195	16.4513	107.136		6.18893	1.36105	1.8685	0.238278	2.29642									0.199316	0.832268	5.27554	1.35426	26.8888		3.49915	2.76837	9.39208	5.17839	107.059		2.44097	2.18664
											0.67664	0.833893	2.00622	6.79489	23.0112		11.3979	12.6262	7.88385	11.5689	63.6124		12.3738	1.23487	0.809459	0.213773	5.58706									0.182102	2.63701	3.47401	3.26	26.2865		3.32812	2.59734	2.9705	5.87808	122.5		5.70039	0.904819
											0.334468	2.63174	2.51762	6.58502	25.7737		9.70824	10.2421	11.1025	13.3104	89.9382		6.81759	1.1534	1.22415	0.230382	2.90046									0.198806	2.26836	3.1286	1.80414	27.1512		3.2711	3.03788	5.40645	5.49973	107.914		3.23417	1.2125
s042		Nexvax2		10		231005	114139	113093	51147.7		0.0668135	21.5476	5.8024	31.5248	5.74743		2.38411	24.204	30.6119	24.172	14.8969		0.13376	0.0850811	0.290819	0.0445573	0.457105		40		213009	108144	95134	52816.5		0.0668135	3.52996	1.32542	3.09907	4.98007		2.90143	3.68236	2.01565	3.15107	34.3773		0.499603	3.57842
											0.0668135	12.9364	5.99848	16.8883	2.22389		2.13302	26.056	6.48345	11.3396	3.69894		0.159918	0.0742701	0.222189	0.0688657	0.543014									0.0668135	0.906426	2.30586	0.157315	7.69713		2.63468	1.94852	6.8603	2.18328	23.3409		1.61831	1.31637
											0.0668135	29.1049	12.4905	20.3929	10.3106		2.46769	30.4369	16.7817	27.3797	12.5706		1.04724	0.207746	0.5602	0.101303	1.04814									0.0668135	1.45801	1.88529	3.06622	10.8093		2.36739	1.9653	5.92557	2.31721	39.0534		0.141877	0.397441
											0.0668135	21.1963	8.09711	22.9353	6.09397		2.32827	26.899	17.959	20.9638	10.3888		0.446972	0.122366	0.357736	0.0715752	0.682754									0.0668135	1.9648	1.83886	2.10754	7.82882		2.6345	2.53206	4.93384	2.55052	32.2572		0.753263	1.76408
s047		Nexvax2		10		161011	70126.7	57119	48071		0.119439	59.0077	15.102	41.7056	100.67		5.87853	112.074	58.414	62.6763	146.094		2.57961	6.98098	6.97836	0.239633	1.38766		30		195219	71481.9	63986.4	35091.2		0.572436	1.11041	4.25859	1.89372	86.995		5.66088	7.21663	10.9873	5.89527	124.435		50.1385	27.6963
											0.181818	53.7685	21.6672	59.5116	92.0913		5.64414	147.143	90.4823	99.0662	138.527		5.64705	34.0581	16.6227	0.350668	1.07742									0.401476	1.44458	2.80002	4.73565	77.8114		5.35941	5.52691	12.0199	5.96223	147.634		10.9071	17.4971
											0.119439	60.8154	16.4546	44.5393	50.2779		7.38375	148.191	43.6023	82.945	94.98		15.0678	28.2739	13.7821	0.82654	16.9069									0.194353	2.66089	2.32366	1.36291	74.4776		6.07939	6.5813	21.7187	5.00753	156.919		11.8513	20.4027
											0.140232	57.8639	17.7413	48.5855	81.0129		6.30214	135.802	64.1662	81.5625	126.534		7.76481	23.1043	12.461	0.47228	6.45732									0.389422	1.73862	3.12742	2.66409	79.7614		5.69989	6.44161	14.9086	5.62168	142.996		24.299	21.8653
s049		Nexvax2		15		235610	95559.4	71425.7	32065.5		0.0530782	10.0629	3.12242	7.22656	2.9974		5.47582	17.7072	8.92557	12.3063	39.3145		0.123748	0.340794	0.169606	0.0846569	0.464496		25		270794	123128	77430	31997.9		0.0530782	0.0530782	0.561115	0.0530782	18.3356		9.61985	7.73849	6.34472	6.61697	385.15		2.08818	0.163149
											0.0530782	6.98804	2.89361	8.11107	4.79502		4.70759	12.7448	5.83381	14.9343	34.6604		0.172029	0.130162	0.526668	0.0421106	0.247504									0.0530782	0.162539	1.14244	0.476666	12.2548		10.2289	10.7192	8.80696	7.11005	482.323		0.112544	0.238543
											0.0530782	9.72238	4.52351	7.57897	3.34362		6.73604	7.75546	4.05754	14.1433	29.181		0.140602	0.156699	0.235287	0.0546393	0.503435									0.0530782	0.0530782	0.0530782	1.0874	10.8449		8.51882	7.55173	7.53475	9.75524	296.518		0.150255	0.15106
											0.0530782	8.92445	3.51318	7.63887	3.71201		5.63981	12.7358	6.27231	13.7946	34.3853		0.14546	0.209219	0.31052	0.0604689	0.405145									0.0530782	0.0895651	0.585545	0.539047	13.8118		9.45586	8.6698	7.56214	7.82742	387.997		0.783658	0.184251
s057		Nexvax2		165		279288	195582	50304	63383.1		0.91593	0.0750209	1.68106	0.591991	2.62556		8.17958	1.8169	12.0038	5.92643	13.7322		0.202571	0.066476	0.132264	0.116416	0.137553		140		111692	89628.7	21378.7	36169.3		0.0750209	1.49965	1.07456	0.852621	6.70099		2.91482	2.04795	4.17693	3.29481	24.9287		0.144169	0.115097
											3.04862	0.0750209	3.84811	1.42294	1.88641		20.1832	0.989069	9.53259	4.67858	10.9292		0.108504	0.0485844	0.0485844	0.0900789	0.0677843									0.136246	0.96241	0.690561	0.263355	2.20813		4.90382	2.66072	3.26952	5.32849	13.635		0.246549	0.160066
											4.03494	0.0750209	2.38225	0.0750209	0.659071		25.717	0.989069	4.15181	4.67858	5.25362		0.115097	0.0485844	0.0874511	0.104552	0.123016									0.0750209	1.07668	1.16359	0.0750209	4.15451		3.19361	4.20205	2.04795	0.989069	35.6268		0.0485844	0.0756418
											2.66649	0.0750209	2.63714	0.696649	1.72368		18.0266	1.26501	8.56272	5.09453	9.97166		0.142057	0.0545483	0.0894331	0.103682	0.109451									0.0954292	1.17958	0.976238	0.396999	4.35454		3.67075	2.97024	3.1648	3.20413	24.7302		0.146434	0.116935
N		Nexvax2		12		12	12	12	12		12	12	12	12	12		12	12	12	12	12		12	12	12	12	12		12		12	12	12	12		12	12	12	12	12		12	12	12	12	12		12	12
Median		Nexvax2		15		212579	91095.3	63448.1	42081.7		0.215584	3.65855	3.16176	4.56833	14.2597		5.97098	14.3032	12.7002	12.4776	62.1617		0.435866	0.355866	0.358249	0.118138	0.57692		50		185508	84648.3	58930	36989.6		0.113343	1.16872	0.988238	0.619142	24.3249		3.47093	3.49542	3.22927	3.13151	136.278		0.336245	0.31162
25th %		Nexvax2		10		164481	69957.4	48330.6	33122.6		0.0619107	0.286838	2.3218	0.908733	3.85091		2.42861	3.42382	7.71016	5.21857	10.8163		0.222052	0.137318	0.172312	0.102194	0.244937		26.25		160913	69470.6	37700	33449.9		0.0739675	0.522713	0.543551	0.384116	5.22311		2.16997	2.39742	2.35623	1.85464	26.6119		0.192887	0.195668
75th %		Nexvax2		176.25		268368	109233	79363.5	51101.9		2.12801	20.0659	8.80051	19.8584	52.1737		34.4391	36.6846	26.4396	28.0838	120.679		1.67065	0.611452	0.782184	0.223905	1.64137		137.5		218867	103609	74080.8	49397.6		0.461217	1.90825	2.80528	2.03169	69.8778		6.94928	6.00871	7.02322	5.42507	340.68		1.13926	1.62618
s003		Placebo		40		171134	49648.5	29859.2	15520.4		0.0656585	4.50902	0.219438	3.92643	5.72147		12.0031	30.0773	8.42953	15.521	38.9587		0.182157	0.183025	0.28025	0.107548	0.170008		35		235387	74867.4	48790.3	30959.3		0.11147	2.8047	2.81103	2.9455	21.3955		6.97484	12.5796	12.7198	16.1429	206.26		0.130966	0.105814
											0.0891469	4.39162	0.473496	1.2113	5.26432		10.1006	17.3861	13.3271	11.894	58.0424		0.663434	0.163067	0.752119	0.103212	0.113619									0.0503795	3.50155	1.30024	0.680501	16.1058		8.16379	10.8027	8.17943	12.8132	128.028		0.142244	0.11969
											0.138197	0.410083	3.42986	2.66575	3.92002		11.2082	10.6311	10.8495	13.7163	22.4603		0.144847	0.266357	0.206458	0.106681	0.258543									0.0684074	4.35305	1.94262	4.3659	24.9856		7.56951	16.2362	9.1014	14.6811	202.745		0.189968	0.0546664
											0.0976673	3.10357	1.37426	2.60116	4.9686		11.104	19.3648	10.8687	13.7105	39.8205		0.330146	0.20415	0.412942	0.105814	0.180724									0.0767524	3.5531	2.01796	2.66397	20.829		7.56938	13.2062	10.0002	14.5458	179.011		0.154393	0.0933901
s005		Placebo		15		206980	63786.4	42008.5	39393.3		0.0854005	18.214	24.3479	24.4666	6.41132		2.70171	26.5138	31.1067	22.7978	45.2842		0.269417	0.225221	0.21981	0.129269	0.230636		15		223778	72325.7	34722.3	36800.2		0.068789	9.04531	9.73703	19.842	13.4571		1.96406	5.63792	12.1622	19.5928	98.6679		0.415957	0.567971
											0.17016	16.3271	32.8574	23.0872	8.21542		3.96817	24.4648	50.8325	35.9859	42.7199		0.274082	0.285755	0.386669	0.17053	0.331017									0.068789	20.43	19.731	11.5834	19.3195		1.86789	28.0159	17.5196	10.4461	119.554		0.455213	0.594473
											0.343042	27.3851	19.881	21.8486	17.14		2.71682	36.7788	30.3417	17.0924	53.86		0.287312	0.282641	0.373321	0.176669	0.270972									0.068789	9.52134	12.0881	12.4282	16.163		1.53026	5.10706	28.8843	5.31019	60.6354		0.50901	0.591908
											0.199534	20.6421	25.6954	23.1341	10.5889		3.1289	29.2525	37.427	25.292	47.288		0.276937	0.264539	0.3266	0.158823	0.277541									0.068789	12.9989	13.852	14.6179	16.3132		1.78741	12.9203	19.522	11.783	92.9526		0.46006	0.584784
s011		Placebo		40		145393	68681.7	25817	40813.4		0.0894875	2.04718	0.719862	0.068789	130.374		3.71034	8.35245	3.42636	2.53875	528.818		2.40855	3.95365	2.42754	0.1335	2.94828		55		185099	89866.7	30040.7	42781.8		0.068789	0.563505	0.068789	2.39669	120.443		3.1576	3.78912	2.8248	6.71147	344.359		0.647498	1.95498
											0.113007	0.0850956	4.55531	3.15333	103.532		3.83637	4.151	10.8758	3.09429	360.176		1.5529	0.453506	3.16525	0.180148	1.45828									0.0792496	0.142599	0.944417	4.20062	122.845		3.1576	3.55264	3.77337	13.2317	357.864		0.731367	0.824721
											0.217281	0.642324	0.370207	2.13841	114.768		4.24527	4.59047	3.83637	11.7797	392.886		2.03168	3.4602	1.66304	0.178451	3.71032									0.083633	0.736953	0.297249	0.08071	134.436		3.28415	3.93082	4.54344	2.55467	399.358		0.562842	1.61829
											0.139925	0.924865	1.88179	1.78684	116.224		3.93066	5.69797	6.04616	5.80426	427.293		1.99771	2.62245	2.41861	0.164033	2.70563									0.0772239	0.481019	0.436818	2.22601	125.908		3.19979	3.75753	3.71387	7.49927	367.194		0.647236	1.466
s019		Placebo		20		187963	73856.7	35746.1	52194.3		0.25325	1.92036	6.26268	3.1947	14.7918		4.83341	7.73611	10.8351	8.78855	61.4864		0.198688	0.504269	0.359296	0.0637892	1.31108		30		198223	93964.9	43990.8	48161.2		0.849409	3.37833	3.13623	5.29642	24.6403		6.06647	7.33592	23.6526	15.4803	91.482		0.310156	0.279041
											0.496296	9.1732	2.38729	2.83276	15.3797		3.95951	24.7415	12.5054	6.94877	38.454		0.271109	0.338689	0.406597	0.0862109	1.13976									0.289403	5.21791	4.6623	1.7414	23.7415		4.80655	7.97608	3.62267	3.55525	52.7603		0.207874	0.184273
											0.512144	3.61252	2.01557	2.13992	20.1339		6.65486	12.5584	6.88198	4.80655	47.162		0.580185	0.442663	0.643522	0.135349	1.51533									0.154605	4.60189	2.62366	2.90899	21.0753		3.8383	19.9738	6.01294	4.14795	57.3784		0.200656	0.398593
											0.420563	4.90203	3.55518	2.72246	16.7685		5.14926	15.012	10.0742	6.84796	49.0342		0.349994	0.42854	0.469805	0.0951163	1.32206									0.431139	4.39938	3.47407	3.31561	23.1524		4.90377	11.7619	11.0961	7.72783	67.2069		0.239562	0.287302
s022		Placebo		25		79385.7	39450.5	11340.8	3023.01		0.0575191	3.03881	1.19973	2.10438	1.59327		14.0138	62.1082	29.5094	21.4333	73.3893		0.232856	0.417276	0.236148	0.137299	0.314134		20		186588	91772	32431.3	36048.1		0.106347	5.63681	0.742586	3.24019	1.90906		14.5425	65.3191	25.0301	33.3394	119.003		0.446675	0.279041
											0.0575191	1.89939	1.58201	1.32967	0.827072		12.4127	34.5145	49.0594	32.3988	98.979		0.295582	0.866317	0.751672	0.109421	0.317449									0.0575191	4.27555	1.72691	2.56049	0.886122		15.5991	80.2736	20.4999	39.0406	52.8771		0.456039	0.286316
											0.0575191	1.42443	0.237552	2.836	0.42981		15.4275	24.0857	22.0377	44.0929	56.1466		0.279702	0.425289	0.185583	0.153571	0.345333									0.0575191	2.62528	1.81554	3.47751	1.56592		17.6434	51.1116	28.7374	46.1349	76.1802		0.622617	0.552611
											0.0575191	2.12088	1.00643	2.09002	0.950051		13.9513	40.2361	33.5355	32.6416	76.1716		0.26938	0.569627	0.391134	0.13343	0.325639									0.0737952	4.17921	1.42834	3.09273	1.4537		15.9284	65.5681	24.7558	39.505	82.6868		0.508443	0.372656
s025		Placebo		240		296275	61049.3	77124.9	15561.1		7.41893	0.0638494	11.6253	1.63361	11.7711		18.1619	0.55217	43.855	5.30714	17.5844		0.207252	0.0242951	0.772529	0.292838	0.191015		145		138087	38838.5	40437.5	47484.7		1.31295	12.204	1.33404	2.17505	9.96789		10.5157	22.3383	6.7253	6.62723	33.1689		2.70123	0.290601
											8.85816	0.0638494	9.56874	6.33326	7.74308		27.7449	0.55217	16.3045	22.579	11.5117		0.221478	0.0242951	0.258813	0.472847	0.203867									0.277597	2.96706	0.0749838	1.63095	4.37118		10.363	9.47402	6.71129	5.93985	26.0178		4.33418	0.304496
											3.43301	0.0638494	8.17076	2.58632	1.75169		16.2494	0.55217	26.0386	8.48269	5.02593		0.176153	0.0242951	0.647227	0.242508	0.166033									3.41474	5.59789	2.31971	4.112	5.26008		9.23758	7.89984	8.52746	7.369	24.561		2.1748	0.319786
											6.57003	0.0638494	9.78826	3.51773	7.08864		20.7187	0.55217	28.7327	12.1229	11.374		0.201628	0.0242951	0.559523	0.336064	0.186972									1.66843	6.92297	1.24291	2.63933	6.53305		10.0387	13.2374	7.32135	6.64536	27.9159		3.07007	0.304961
s033		Placebo		50		153965	140949	48616.9	55490.3		0.308069	4.97569	0.531573	0.342973	26.8246		15.5028	18.6903	10.154	8.61464	205.228		0.11975	0.181208	0.191777	0.0996855	0.239914		30		158235	157852	32899.1	39186.3		0.657248	0.174291	6.42269	0.502674	52.0548		13.839	10.7293	14.9741	16.5135	574.414		0.103691	0.10289
											0.0952159	0.0564181	0.0564181	0.0564181	23.2491		14.9897	10.6049	10.0762	8.98781	233.655		0.182833	0.0932847	0.11975	0.0749441	0.343462									0.0936789	0.193052	0.427421	3.24822	43.874		17.7574	13.9945	11.1024	17.7263	486.588		0.379816	0.460252
											0.0814069	0.0564181	0.972331	0.0564181	26.7925		15.0052	10.5271	10.9159	8.27257	211.775		0.108503	0.0964838	0.0662095	0.125384	0.148785									0.654017	0.967435	0.0829384	1.64302	41.6851		24.5368	21.769	13.2482	17.9906	452.855		0.362454	0.181208
											0.161564	1.69617	0.520107	0.151936	25.6221		15.1659	13.2741	10.382	8.62501	216.886		0.137029	0.123659	0.125912	0.100004	0.244054									0.468314	0.444926	2.31102	1.79797	45.8713		18.7111	15.4976	13.1083	17.4101	504.619		0.281987	0.248117
s043		Placebo		180		191663	83678.7	66609.3	20253		60.4566	0.0668135	41.134	6.07363	22.8731		133.834	0.647273	64.2732	7.4657	40.4461		0.811777	0.0364596	0.157212	0.260112	0.206843		165		81420.7	48033.2	25098.6	45993.4		0.99675	36.9132	3.81437	20.1827	54.7186		4.15212	36.8695	3.48026	21.9176	120.108		0.281169	0.204724
											37.8315	0.0668135	30.4919	10.4302	25.4171		135.986	0.647273	40.1613	14.7517	28.2402		2.41424	0.0337085	0.143681	0.203233	0.20233									0.254106	18.502	10.5843	22.4425	72.3413		3.16079	16.6919	16.3265	26.4721	156.886		0.286065	0.229067
											41.5067	0.0668135	26.7095	6.25511	30.1762		151.3	0.647273	42.9129	11.8906	56.3895		0.388402	0.0355601	0.308885	0.23212	0.223092									0.630213	32.5084	7.2887	18.9409	47.7582		3.49707	42.0848	2.0826	14.7314	88.4464		0.255091	0.239633
											46.5983	0.0668135	32.7785	7.58631	26.1555		140.373	0.647273	49.1158	11.3694	41.6919		1.20481	0.0352428	0.20326	0.231822	0.210755									0.627023	29.3079	7.2291	20.522	58.2727		3.60333	31.882	7.29647	21.0404	121.813		0.274109	0.224475
s055		Placebo		165		278586	136266	92347.9	41276.4		7.9838	0.0530782	27.3405	17.3401	20.8173		25.476	0.660848	27.7799	28.5139	28.0468		0.264632	0.0389408	0.156699	0.19144	0.144622		135		172767	83267.1	61217.2	47925.9		0.0760824	20.3767	6.00516	9.1349	22.437		2.51176	62.8691	24.2561	29.9646	150.849		0.429767	0.262184
											5.24366	0.0544997	20.413	13.5899	29.7062		38.8329	0.660848	31.231	12.1376	23.3031		0.236915	0.0389408	0.135781	0.206031	0.0759357									0.0530782	11.1816	2.50065	16.0502	13.2255		3.42324	36.8056	3.732	35.1262	120.647		0.432245	0.423985
											2.80451	0.0530782	29.7167	18.0087	15.1533		26.2609	0.660848	42.5348	16.4476	19.2339		0.173644	0.0389408	0.213336	0.246689	0.166377									0.115396	9.53035	2.61689	15.5519	17.4157		4.09179	21.2782	6.34472	35.0097	91.4155		0.421508	0.240986
											5.34399	0.053552	25.8234	16.3129	21.8923		30.1899	0.660848	33.8486	19.033	23.5279		0.225064	0.0389408	0.168605	0.21472	0.128978									0.0815188	13.6962	3.70756	13.579	17.6927		3.34226	40.3176	11.4443	33.3668	120.971		0.42784	0.309052
N		Placebo		9		9	9	9	9		9	9	9	9	9		9	9	9	9	9		9	9	9	9	9		9		9	9	9	9		9	9	9	9	9		9	9	9	9	9		9	9
Median		Placebo		40		187963	68681.7	42008.5	39393.3		0.199534	1.69617	3.55518	2.72246	16.7685		13.9513	13.2741	28.7327	12.1229	47.288		0.276937	0.20415	0.391134	0.158823	0.244054		35		185099	83267.1	34722.3	42781.8		0.0815188	4.39938	2.31102	3.09273	20.829		4.90377	13.2374	11.0961	14.5458	120.971		0.42784	0.304961
25th %		Placebo		22.5		149679	55348.9	27838.1	15540.7		0.118796	0.0653315	1.19035	1.93843	6.02862		4.53996	0.654061	10.2281	7.73648	31.6742		0.213346	0.0370918	0.185932	0.102909	0.183848		25		148161	60179.5	31236	36424.1		0.0752738	2.01706	1.33563	2.43267	11.4231		3.27102	12.3411	7.30891	7.61355	74.9468		0.256835	0.236296
75th %		Placebo		172.5		242783	109972	71867.1	46735.3		5.95701	4.0028	25.7594	11.9496	25.8888		25.4543	24.3086	35.6378	22.1625	146.529		0.7774	0.499084	0.514664	0.223271	0.823848		140		211001	92868.5	46390.6	47705.3		0.547669	13.3476	5.46833	14.0984	52.072		12.9836	36.0998	16.3152	27.2036	273.102		0.57784	0.47872
[truncated: 3 more columns]
